# Supplementary material for: Validating the Threshold Effect of Coagulation-Platelet Index INR_PLT for Precision Risk Stratification in Non-traumatic Subarachnoid Hemorrhage: A Multicenter Machine Learning Approach
Source: Research Square preprint supplement (doi:10.21203/rs.3.rs-7215846/v1), 2025-08-05
Supplement: Supplementary file 1 [file 1b474203bb5a7860990774d4.doc]

Table S1 Raw Baseline Characteristics of the Training Set

|  | **All patients** | **Alive** | **Dead** | **P** |
| --- | --- | --- | --- | --- |
|  | N=287 | N=244 | N=43 |  |
| Age | 57.00 (48.00,67.00) | 56.00 (48.00,65.00) | 69.00 (57.50,76.50) | <0.001 |
| First gcs | 14.00 (9.00,15.00) | 14.00 (9.00,15.00) | 8.00 (4.00,11.50) | <0.001 |
| Cl | 103.00 (100.00,105.00) | 103.00 (100.00,105.00) | 103.00 (101.00,104.00) | 0.988 |
| Ca | 2.24 (2.15,2.31) | 2.24 (2.17,2.31) | 2.21 (2.13,2.35) | 0.973 |
| BUN | 4.50 (3.40,5.90) | 4.50 (3.42,5.70) | 4.90 (3.40,6.90) | 0.176 |
| K | 3.64 (3.33,3.90) | 3.63 (3.33,3.91) | 3.67 (3.32,3.80) | 0.516 |
| Na | 137.00 (136.00,139.00) | 137.00 (136.00,139.00) | 138.00 (136.00,139.00) | 0.857 |
| Cr | 65.00 (54.00,77.00) | 64.00 (54.00,76.00) | 67.00 (56.00,81.00) | 0.231 |
| HB | 126.00 (113.00,136.00) | 126.00 (114.00,137.00) | 125.00 (107.50,133.00) | 0.161 |
| RBC | 4.00 (3.00,4.00) | 4.00 (3.00,4.00) | 4.00 (3.00,4.00) | 0.088 |
| WBC | 12.60 (10.20,15.50) | 12.29 (10.20,14.90) | 13.60 (10.05,17.80) | 0.131 |
| HCT | 39.20 (36.70,42.30) | 39.30 (36.73,42.38) | 39.00 (36.20,41.60) | 0.461 |
| GLU | 3.92 (3.38,4.72) | 3.84 (3.34,4.53) | 4.50 (3.63,6.24) | 0.004 |
| SBP | 148.00 (133.00,164.00) | 145.00 (133.00,162.00) | 157.00 (142.50,174.00) | 0.017 |
| DBP | 87.00 (78.00,97.00) | 87.00 (78.00,96.00) | 89.00 (80.00,97.50) | 0.333 |
| INR | 1.10 (1.10,1.30) | 1.10 (1.10,1.20) | 1.30 (1.10,1.50) | <0.001 |
| PLT | 234.00 (215.00,255.00) | 238.00 (218.00,256.00) | 220.00 (214.00,233.50) | 0.001 |
| Gender |  |  |  | 0.003 |
| Female | 164 (57.14%) | 130 (53.28%) | 34 (79.07%) |  |
| Male | 123 (42.86%) | 114 (46.72%) | 9 (20.93%) |  |
| Hydrocephalus |  |  |  | 0.003 |
| No | 216 (75.26%) | 192 (78.69%) | 24 (55.81%) |  |
| Yes | 71 (24.74%) | 52 (21.31%) | 19 (44.19%) |  |
| Cerebral infarction |  |  |  | 0.011 |
| No | 226 (89.33%) | 193 (91.90%) | 33 (76.74%) |  |
| Yes | 27 (10.67%) | 17 (8.10%) | 10 (23.26%) |  |
| Drainage |  |  |  | 1.000 |
| No | 165 (65.22%) | 137 (65.24%) | 28 (65.12%) |  |
| Yes | 88 (34.78%) | 73 (34.76%) | 15 (34.88%) |  |
| Antiplatelet drugs |  |  |  | 0.101 |
| No | 139 (54.94%) | 110 (52.38%) | 29 (67.44%) |  |
| Yes | 114 (45.06%) | 100 (47.62%) | 14 (32.56%) |  |
| Nimodipine |  |  |  | 0.069 |
| No | 124 (49.01%) | 97 (46.19%) | 27 (62.79%) |  |
| Yes | 129 (50.99%) | 113 (53.81%) | 16 (37.21%) |  |
| Rivaroxaban |  |  |  | 0.128 |
| No | 216 (85.38%) | 183 (87.14%) | 33 (76.74%) |  |
| Yes | 37 (14.62%) | 27 (12.86%) | 10 (23.26%) |  |
| Diabetes |  |  |  | 0.004 |
| No | 222 (85.06%) | 192 (88.07%) | 30 (69.77%) |  |
| Yes | 39 (14.94%) | 26 (11.93%) | 13 (30.23%) |  |
| Smoking |  |  |  | 0.605 |
| No | 205 (78.54%) | 173 (79.36%) | 32 (74.42%) |  |
| Yes | 56 (21.46%) | 45 (20.64%) | 11 (25.58%) |  |
| Hypertension |  |  |  | 0.888 |
| No | 127 (48.66%) | 107 (49.08%) | 20 (46.51%) |  |
| Yes | 134 (51.34%) | 111 (50.92%) | 23 (53.49%) |  |
| Pneumonia |  |  |  | 0.888 |
| No | 127 (48.66%) | 107 (49.08%) | 20 (46.51%) |  |
| Yes | 134 (51.34%) | 111 (50.92%) | 23 (53.49%) |  |
| Meningitis |  |  |  | 0.084 |
| No | 225 (86.21%) | 192 (88.07%) | 33 (76.74%) |  |
| Yes | 36 (13.79%) | 26 (11.93%) | 10 (23.26%) |  |
