# Supplementary material for: Validating the Threshold Effect of Coagulation-Platelet Index INR_PLT for Precision Risk Stratification in Non-traumatic Subarachnoid Hemorrhage: A Multicenter Machine Learning Approach
Source: Research Square preprint supplement (doi:10.21203/rs.3.rs-7215846/v1), 2025-08-05
Supplement: Supplementary file 2 [file 7ec04748a85cbd15520bb7d5.doc]

Table S2 Performance Evaluation Table for 10-fold Multiple Imputation on the Training Set

|  | **null.deviance** | **df.null** | **logLik** | **AIC** | **BIC** | **deviance** | **df.residual** | **nobs** |
| --- | --- | --- | --- | --- | --- | --- | --- | --- |
| 1 | 242 | 286 | -71.9 | 204 | 314 | 144 | 257 | 287 |
| 2 | 242 | 286 | -71 | 202 | 312 | 142 | 257 | 287 |
| 3 | 242 | 286 | -71.9 | 204 | 314 | 144 | 257 | 287 |
| 4 | 242 | 286 | -69.3 | 199 | 308 | 139 | 257 | 287 |
| 5 | 242 | 286 | -71.9 | 204 | 314 | 144 | 257 | 287 |
| 6 | 242 | 286 | -70.3 | 201 | 310 | 141 | 257 | 287 |
| 7 | 242 | 286 | -71.2 | 202 | 312 | 142 | 257 | 287 |
| 8 | 242 | 286 | -70.6 | 201 | 311 | 141 | 257 | 287 |
| **9** | **242** | **286** | **-69** | **198** | **308** | **138** | **257** | **287** |
| 10 | 242 | 286 | -70.7 | 201 | 311 | 141 | 257 | 287 |
