# Supplementary material for: Validating the Threshold Effect of Coagulation-Platelet Index INR_PLT for Precision Risk Stratification in Non-traumatic Subarachnoid Hemorrhage: A Multicenter Machine Learning Approach
Source: Research Square preprint supplement (doi:10.21203/rs.3.rs-7215846/v1), 2025-08-05
Supplement: Supplementary file 3 [file b9bb9b2272f55661d50eec9b.doc]

Table S3 ****Table of Raw Baseline Characteristics for the Validation Set****

|  | **All patients** | **Alive** | **Dead** | **P** |
| --- | --- | --- | --- | --- |
|  | N=621 | N=501 | N=120 |  |
| Age | 62.00 (51.00,75.00) | 61.00 (51.00,73.00) | 69.50 (53.50,79.50) | 0.001 |
| First_gcs | 8.00 (3.00,14.00) | 12.00 (6.00,14.00) | 3.00 (3.00,4.00) | <0.001 |
| Cl | 104.00 (101.00,107.00) | 104.00 (102.00,107.00) | 104.00 (100.00,109.00) | 0.846 |
| Ca | 2.17 (2.05,2.27) | 2.17 (2.05,2.27) | 2.10 (2.00,2.30) | 0.376 |
| BUN | 5.00 (3.57,6.78) | 4.64 (3.57,6.07) | 6.43 (4.64,9.73) | <0.001 |
| K | 3.90 (3.60,4.30) | 3.90 (3.60,4.20) | 4.10 (3.70,4.60) | 0.001 |
| Na | 139.00 (137.00,141.00) | 139.00 (137.00,141.00) | 140.00 (137.00,143.00) | 0.060 |
| Cr | 70.72 (61.88,88.40) | 70.72 (53.04,79.56) | 97.24 (70.72,123.76) | <0.001 |
| HB | 122.00 (110.00,134.00) | 123.00 (112.00,134.00) | 120.00 (101.00,133.50) | 0.057 |
| RBC | 4.06 (3.67,4.45) | 4.08 (3.70,4.45) | 3.94 (3.38,4.43) | 0.017 |
| WBC | 11.00 (8.70,14.00) | 10.50 (8.50,13.50) | 13.10 (10.25,16.05) | <0.001 |
| HCT | 37.10 (33.60,40.30) | 37.20 (33.90,40.30) | 36.10 (31.20,40.30) | 0.108 |
| GLU | 7.11 (5.94,8.56) | 6.89 (5.83,8.22) | 8.00 (6.83,11.01) | <0.001 |
| SBP | 131.00 (116.00,145.00) | 131.00 (118.00,145.00) | 128.00 (111.00,147.50) | 0.220 |
| DBP | 72.00 (62.00,82.00) | 72.00 (62.00,81.00) | 72.00 (61.50,83.50) | 0.758 |
| INR | 1.10 (1.10,1.20) | 1.10 (1.10,1.20) | 1.20 (1.10,1.30) | <0.001 |
| PLT | 210.00 (171.75,259.00) | 215.00 (178.00,260.00) | 196.00 (150.00,253.50) | 0.008 |
| Gender: |  |  |  | 0.020 |
| 0 | 366 (58.94%) | 307 (61.28%) | 59 (49.17%) |  |
| 1 | 255 (41.06%) | 194 (38.72%) | 61 (50.83%) |  |
| Hydrocephalus: |  |  |  | 0.008 |
| 0 | 596 (95.97%) | 476 (95.01%) | 120 (100.00%) |  |
| 1 | 25 (4.03%) | 25 (4.99%) | 0 (0.00%) |  |
| Cerebral_infarction: |  |  |  | 0.825 |
| 0 | 514 (82.77%) | 416 (83.03%) | 98 (81.67%) |  |
| 1 | 107 (17.23%) | 85 (16.97%) | 22 (18.33%) |  |
| Drainage: |  |  |  | 1.000 |
| 0 | 420 (67.63%) | 339 (67.66%) | 81 (67.50%) |  |
| 1 | 201 (32.37%) | 162 (32.34%) | 39 (32.50%) |  |
| Antiplatelet_drugs: |  |  |  | <0.001 |
| 0 | 426 (68.60%) | 327 (65.27%) | 99 (82.50%) |  |
| 1 | 195 (31.40%) | 174 (34.73%) | 21 (17.50%) |  |
| Nimodipine: |  |  |  | <0.001 |
| 0 | 277 (44.61%) | 198 (39.52%) | 79 (65.83%) |  |
| 1 | 344 (55.39%) | 303 (60.48%) | 41 (34.17%) |  |
| Rivaroxaban: |  |  |  | 0.349 |
| 0 | 619 (99.68%) | 500 (99.80%) | 119 (99.17%) |  |
| 1 | 2 (0.32%) | 1 (0.20%) | 1 (0.83%) |  |
| Diabetes: |  |  |  | 0.026 |
| 0 | 516 (83.09%) | 425 (84.83%) | 91 (75.83%) |  |
| 1 | 105 (16.91%) | 76 (15.17%) | 29 (24.17%) |  |
| Smoking: |  |  |  | 0.345 |
| 0 | 604 (97.26%) | 489 (97.60%) | 115 (95.83%) |  |
| 1 | 17 (2.74%) | 12 (2.40%) | 5 (4.17%) |  |
| Hypertension: |  |  |  | 0.063 |
| 0 | 302 (48.63%) | 234 (46.71%) | 68 (56.67%) |  |
| 1 | 319 (51.37%) | 267 (53.29%) | 52 (43.33%) |  |
| Pneumonia: |  |  |  | <0.001 |
| 0 | 446 (71.82%) | 378 (75.45%) | 68 (56.67%) |  |
| 1 | 175 (28.18%) | 123 (24.55%) | 52 (43.33%) |  |
| Meningitis: |  |  |  | 0.222 |
| 0 | 611 (98.39%) | 491 (98.00%) | 120 (100.00%) |  |
| 1 | 10 (1.61%) | 10 (2.00%) | 0 (0.00%) |  |
