# Supplementary material for: Validating the Threshold Effect of Coagulation-Platelet Index INR_PLT for Precision Risk Stratification in Non-traumatic Subarachnoid Hemorrhage: A Multicenter Machine Learning Approach
Source: Research Square preprint supplement (doi:10.21203/rs.3.rs-7215846/v1), 2025-08-05
Supplement: Supplementary file 4 [file d76b108769296209983a84f2.doc]

Table S4 ****Performance Evaluation Table for 10-fold Multiple Imputation on the Validation Set****

|  | **null.deviance** | **df.null** | **logLik** | **AIC** | **BIC** | **deviance** | **df.residual** | **nobs** |
| --- | --- | --- | --- | --- | --- | --- | --- | --- |
| **1** | **610** | **620** | **-163** | **386** | **519** | **326** | **591** | **621** |
| 2 | 610 | 620 | -165 | 389 | 522 | 329 | 591 | 621 |
| 3 | 610 | 620 | -164 | 388 | 521 | 328 | 591 | 621 |
| 4 | 610 | 620 | -165 | 391 | 524 | 331 | 591 | 621 |
| 5 | 610 | 620 | -167 | 394 | 526 | 334 | 591 | 621 |
| 6 | 610 | 620 | -165 | 390 | 523 | 330 | 591 | 621 |
| 7 | 610 | 620 | -164 | 388 | 521 | 328 | 591 | 621 |
| 8 | 610 | 620 | -165 | 390 | 523 | 330 | 591 | 621 |
| 9 | 610 | 620 | -166 | 391 | 524 | 331 | 591 | 621 |
| 10 | 610 | 620 | -167 | 394 | 527 | 334 | 591 | 621 |
